# Supplementary material
Source: Springer Nature journal article supplement (https://www.springermedizin.de/resource/supplementary/12905_2012_318_MOESM3_ESM.pdf/9518556)

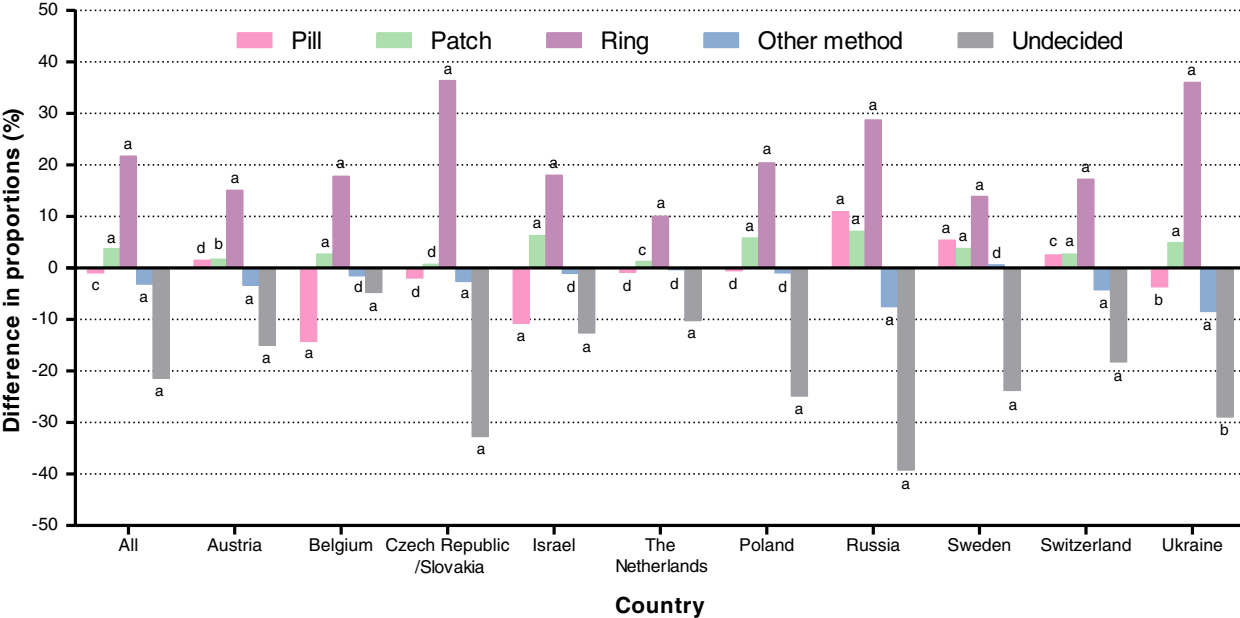

Supplement: MOESM3 [file 9518556]
